# Supplementary material
Source: PubMed Central journal article supplement (PMC7210283)
Supplement: 42003_2020_908_MOESM4_ESM.pdf [file 42003_2020_908_MOESM4_ESM.pdf]

## Description of Additional Supplementary Files

**Supplementary Data 1:** Data for generating Fig. 2b-e. Data are formatted in Excel (.xlsx).  
206. S. Martin Jischke Dr. West Lafayette, IN, 47906 fanguang@purdue.edu  
liu1840@purdue.edu

**Supplementary Data 2:** Data for generating the profile plots in Fig. 3d,e. Data are formatted in Matlab (.mat) and the Matlab script (Fig3de\_script.m) for generating the profile plots is included. Data can be accessed through Figshare.

**Supplementary Data 3:** Data for generating the profile plots in Fig. 4e,f. Data are formatted in Matlab (.mat) and the Matlab script (Fig4ef\_script.m) for generating the profile plots is included. Data can be accessed through Figshare.

**Supplementary Software:** PR-4Pi software package for analyzing single molecule blinking dataset from 4Pi-SMSN systems.
